1 **Nowcasting and Forecasting the 2022 U.S. Mpox Outbreak: Support for Public Health**

2 **Decision Making and Lessons Learned**

3 Kelly Charniga, PhD<sup>1,2\*</sup>, Zachary J. Madewell, PhD<sup>1,3</sup>, Nina B. Masters, PhD<sup>4</sup>, Jason Asher, PhD<sup>5</sup>,

4 Yoshinori Nakazawa, PhD<sup>2</sup>, Ian H. Spicknall, PhD<sup>6</sup>

5

6 <sup>1</sup> These first authors contributed equally to this article.

7 <sup>2</sup> Division of High Consequence Pathogens and Pathology, National Center for Emerging and Zoonotic  
8 Infectious Diseases, CDC

9 <sup>3</sup> Center for Global Health, CDC

10 <sup>4</sup> Epidemic Intelligence Service, CDC

11 <sup>5</sup> Center for Forecasting and Outbreak Analytics, CDC

12 <sup>6</sup> Division of Sexually Transmitted Disease Prevention, National Center for HIV, Viral Hepatitis, STD, &  
13 TB Prevention, CDC

14

15 \* Corresponding author, email: [ruq7@cdc.gov](mailto:ruq7@cdc.gov)

16

17

18

19

20

21

22

23

24

25

26 Keywords: monkeypox virus, modeling, epidemic, real-time analysis, situational awareness

27

28 **Abstract**

29 In June of 2022, the U.S. Centers for Disease Control and Prevention (CDC) Mpox Response wanted  
30 timely answers to important epidemiological questions which can now be answered more effectively  
31 through infectious disease modeling. Infectious disease models have shown to be valuable tool for  
32 decision making during outbreaks; however, model complexity often makes communicating the results  
33 and limitations of models to decision makers difficult. We performed nowcasting and forecasting for the  
34 2022 mpox outbreak in the United States using the R package EpiNow2. We generated  
35 nowcasts/forecasts at the national level, by Census region, and for jurisdictions reporting the greatest  
36 number of mpox cases. Modeling results were shared for situational awareness within the CDC Mpox  
37 Response and publicly on the CDC website. We retrospectively evaluated forecast predictions at four key  
38 phases during the outbreak using three metrics, the weighted interval score, mean absolute error, and  
39 prediction interval coverage. We compared the performance of EpiNow2 with a naïve Bayesian  
40 generalized linear model (GLM). The EpiNow2 model had less probabilistic error than the GLM during  
41 every outbreak phase except for the early phase. We share our experiences with an existing tool for  
42 nowcasting/forecasting and highlight areas of improvement for the development of future tools. We also  
43 reflect on lessons learned regarding data quality issues and adapting modeling results for different  
44 audiences.

## 45 **Background**

46           The 2022 mpox (formerly known as monkeypox) outbreak is the first major infectious disease  
47 outbreak since the COVID-19 pandemic and was declared a Public Health Emergency of International  
48 Concern by the World Health Organization on July 23, 2022 (1). As of April 13, 2023, a total of 86,956  
49 confirmed cases have been reported in 110 countries and territories (2). Unlike COVID-19, mpox is a  
50 disease known to be endemic in West and Central Africa for decades; it is caused by monkeypox virus  
51 (MPXV), a zoonotic orthopoxvirus (3). Historically, classical symptoms involved fever, headache, muscle  
52 aches, fatigue, lymphadenopathy, and rash (4). Human-to-human MPXV transmission occurs through  
53 close contact with infectious material from skin lesions, respiratory secretions during prolonged face-to-  
54 face contact, and fomites, such as linens and bedding (5). The 2022 mpox outbreak began in May and  
55 spread rapidly in non-endemic countries. This outbreak was characterized by human-to-human  
56 transmission of MPXV through close physical contact (often associated with sexual activities) and has  
57 disproportionately affected gay, bisexual, and other men who have sex with men (6).

58           During a public health crisis such as the mpox outbreak, difficult and rapid decisions with limited  
59 available data are often required (7). Infectious disease models may assist with informing policy and  
60 practice by predicting the magnitude and duration of an outbreak or epidemic, evaluating characteristics  
61 of pathogen transmission such as transmissibility, and designing vaccination strategies, among others (8,  
62 9). However, infectious disease models are often complex, integrating data from heterogenous sources  
63 with many parameter assumptions that are subject to uncertainty. These aspects make it challenging to  
64 effectively implement such models and communicate the results and potential limitations to decision  
65 makers, other public health partners, and the general public (10, 11).

66           During the COVID-19 pandemic, the state of the art of outbreak analysis advanced considerably  
67 (12). Methods and tools for estimating key epidemiological parameters, such as the effective reproduction  
68 number,  $R_t$ , were developed and shared in real-time (13). Monitoring  $R_t$ , the average number of secondary  
69 cases caused by a single infected individual in a large population, during an outbreak is useful for  
70 assessing transmission dynamics and evaluating the effectiveness of public health measures (e.g.,

71 vaccination, contact tracing, isolation, and quarantine) (14). Nowcasts and forecasts have been produced  
72 by numerous research groups around the globe (15-18), the results of which were instrumental for  
73 decision makers weighing possible control measures (19) such as social distancing measures. Outbreak  
74 forecasting predicts specific outcomes (e.g., number of cases, deaths, or hospitalizations) at some specific  
75 future times (e.g., weeks, months, etc.), whereas nowcasting estimates those outcomes for the current  
76 time, accounting for delays in reporting.

77 In this manuscript, we share our experience nowcasting and forecasting the mpox outbreak,  
78 including adapting the modeling output to different audiences. We also describe challenges faced vis-a-  
79 vis data quality, parameter estimation, and model application and propose ways to improve nowcasting  
80 and short-term forecasting efforts for future outbreaks.

## 81 **Methods**

### 82 **Nowcasting/forecasting the mpox outbreak**

83 We used data on probable and confirmed mpox cases in the United States (see “Case definition”  
84 in Supplementary methods) reported to CDC by state and local public health jurisdictions from May 17,  
85 2022, through March 16, 2023. Data were submitted in several different formats throughout the outbreak  
86 period. These formats included: a CDC-operated call center through the Emergency Operations Center  
87 (EOC), a long and a short case report form (CRF), and the National Notifiable Diseases Surveillance  
88 System (NNDSS). Cases could have data submitted via more than one format and jurisdictions could  
89 update data on cases after initial submission (Supplementary methods). All reported data were processed  
90 in CDC’s Data Collation and Integration for Public Health Event Response (DCIPHER) platform, an  
91 instance of Palantir Foundry (Palantir Technologies Inc, Denver, CO). DCIPHER is a secure, cloud-based  
92 data integration, analytics, and situational awareness platform used by the Centers for Disease Control  
93 and Prevention (CDC), federal partners, and state, tribal, local, and territorial public health jurisdictions to  
94 collect, collaborate on, and share public health data (20). DCIPHER collates data of differing origin,  
95 structure, and purpose to provide near real-time insights into public health problems, with the goal of  
96 providing a complete picture of situational awareness.

97 We considered three approaches for estimating  $R_t$  which are implemented in the R packages  
98 EpiEstim (version 2.2-4) (21), earlyR (version 0.0.5) (22), and EpiNow2 (version 1.3.2) (23)  
99 (Supplementary methods). Initially, we used all three methods to estimate  $R_t$  at the national level as well  
100 as for jurisdictions reporting the highest incidence of mpox. Although estimates of the historical range of  
101 the serial interval of mpox were available at the start of the outbreak, they were based on data from the  
102 Democratic Republic of Congo, which reflected largely non-sexual household spread (24). We considered  
103 these historical parameter estimates as a starting point for early outbreak analysis, using them (along with  
104 sensitivity analyses) until new estimates were generated. Updated estimates characterized by the mean  
105 and standard deviation were needed for the global outbreak given the novel mode of transmission. In June  
106 2022, we were able to use an estimated mean serial interval (i.e., the period of time between symptom  
107 onset in the primary case and symptom onset in the secondary case) of 9.8 days (95% credible interval  
108 [CrI]: 5.9 – 21.4) from 17 case pairs reported by the United Kingdom (6). At that time, symptom onset  
109 date was available for most reported cases, and imported cases were still contributing to a high proportion  
110 of MPXV transmission. EpiEstim results were considered the most appropriate at this stage of the  
111 outbreak because this method accounts for imported vs. locally acquired cases, has a stable codebase, is  
112 widely used, and is computationally efficient (25).

113 In July 2022, we started exclusively using EpiNow2, which uses a similar approach as EpiEstim  
114 (a branching process model, Supplementary methods), but it better accounts for reporting delays and  
115 incorporates multiple sources of uncertainty (13); for example, it removes noise associated with weekend  
116 effects and uses random walks for temporal smoothing. Forecasting is supported internally for  $R_t$ , number  
117 of infections, cases by date of report, and growth rate. Unlike EpiEstim, EpiNow2 does not distinguish  
118 between imported vs. locally acquired infections. EpiNow2 is the most computationally expensive  
119 approach, requiring longer model run times (Supplementary methods). The model assumes that testing  
120 procedures, surveillance effort, and reporting delays remain constant over the estimation period. To use  
121 EpiNow2, cases by date of report must be provided as well as the generation time distribution (the time  
122 between infection of a primary and secondary case), incubation period distribution (the time between

123 infection and symptom onset in a case), and any other delay distributions (e.g., the delay between  
124 symptom onset and report date). The model estimates the number of new cases by date of report, number  
125 of cases by their date of infection,  $R_t$ , and time-varying growth rate. Estimates over the last 16 days of the  
126 time-series are based on partial data due to the presumption of reporting delays. Input parameters and  
127 methods for adjusting for right-truncation evolved as we learned more about the outbreak.

## 128 **Communication methods**

129  $R_t$  estimates were shared internally through Situational Reports and leadership meetings and  
130 publicly through CDC's Technical Reports (26) and CDC's public-facing mpox website (27). The  
131 Technical Reports were co-led by the Center for Forecasting and Outbreak Analytics (CFA) and the 2022  
132 Multi-National Mpox Outbreak Response. Estimates were generated for distribution at least once per  
133 week. The technical reports were intended for scientific audiences. The purpose of sharing these results  
134 was to improve understanding of the outbreak and inform further scientific inquiry.

## 135 **Performance assessment methods**

136 We chose eight dates during four key outbreak phases to retrospectively evaluate our short-term  
137 (one-week-ahead) forecasts of reported mpox cases generated from EpiNow2: 1. one month into the  
138 outbreak prior to exponential growth (June 13 and June 27); 2. during exponential growth (July 5); 3. near  
139 the outbreak peak (July 27); and 4. during the declining phase (September 6, September 19, October 11,  
140 and December 5). Ideally, the same day of the week would be used, but some historical versions of the  
141 dataset were not available for this analysis and some dates fell on national holidays which may have  
142 introduced additional delays. Like the real-time analyses, we used rash onset date as the first reference  
143 date to define the reporting delay distribution for all eight time points, while the second reference date  
144 changed over time (Table S1).

145 We used three metrics to evaluate the forecasts. Our primary metric was the weighted interval  
146 score (WIS). For each of the eight time points considered, WIS was computed for each daily prediction  
147 and averaged across the seven-day forecast. The WIS measures the consistency of a group of prediction  
148 intervals with an observed value (probabilistic accuracy). The WIS is positive, and lower values

149 correspond to smaller error (Supplementary methods) (15). To evaluate the error in the forecast's point  
150 estimate, we used the mean absolute error (MAE), which was computed as  $MAE = \frac{1}{N} \sum_{i=1}^N |y_i - \hat{y}_i|$ ,  
151 where  $y_i$  is the observed number of mpox cases on day  $i$ ,  $\hat{y}_i$  is the median forecast on day  $i$ , and  $N = 7$   
152 (15). We also used prediction interval (PI) coverage rates, which check the degree to which the model  
153 provides calibrated predictions. Coverage rates are calculated by determining the proportion of times the  
154 50% or 90% PIs included the observed value (for example, a well-calibrated forecast would have a 50%  
155 PI coverage close to 0.50. Also see Supplementary methods) (15).

156 We compared the performance of EpiNow2 with a naïve Bayesian generalized linear model  
157 (GLM, Supplementary methods). We calculated the relative WIS and relative MAE for EpiNow2 and the  
158 GLM as  $\theta_{EpiNow2, GLM} = \frac{\text{mean score of EpiNow2}}{\text{mean score of GLM}}$ , where the mean score is the average of the models'  
159 performance (WIS or MAE) over all eight dates evaluated. If  $\theta_{EpiNow2, GLM}$  was less than 1, that indicated  
160 the forecasts generated by EpiNow2 had less error than the GLM, whereas  $\theta_{EpiNow2, GLM} > 1$  indicated  
161 EpiNow2 performed worse.

162 For both EpiNow2 and the GLM, we removed recent cases (defined as cases reported in the last 3  
163 – 5 days) from the time series to adjust for right truncation of the data for all four outbreak phases (Table  
164 S1). Forecasts were evaluated using mpox data as of March 16, 2023. We used the most recent version of  
165 event date as the basis for the comparison.

## 166 **Results**

### 167 **Challenges of nowcasting/forecasting**

168 It is voluntary for jurisdictions to report mpox cases to CDC, with only minimal data needed to  
169 submit a case report form (e.g., case ID and reporting jurisdiction) in part, because not all cases may be  
170 reached or fully investigated. CDC asks jurisdictions to collect and report additional data variables to  
171 achieve situational awareness and surveillance goals. The number of variables on the case report form  
172 was decreased to reduce reporting burden. Despite these efforts, jurisdictional case surveillance systems  
173 may not have aligned to CDC's requested data variables, and jurisdictions may choose to limit what data

174 are shared with CDC based on local reporting practices. Received data were subjected to additional  
175 manual data cleaning to standardize formats and correct obvious data entry errors. As a result, even key  
176 data variables such as demographic characteristics (e.g., age, race/ethnicity, HIV status, vaccination) were  
177 not consistently available across all jurisdictions and time periods, precluding detailed sub-analyses. For  
178 example, out of 29,921 cases in DCIPHER through December 31, 2022, 21,480 (71.8%) were missing  
179 HIV status, 16,474 (55.1%) were missing smallpox vaccination, 3,913 (13.1%) were missing gender  
180 identity, 3,172 (10.6%) were missing race, 2,928 (9.8%) were missing ethnicity, and 250 (0.8%) were  
181 missing age. The timing and frequency of data submission varied between jurisdictions and changed over  
182 the course of the outbreak. Some jurisdictions reported case data in near real-time whereas others  
183 submitted a large number of cases all at once, the latter of which caused large, artificial spikes in the time-  
184 series. There were instances of duplicate cases being reported from several jurisdictions which may be  
185 attributed to the changes in reporting processes. Spurious cases at the end of the time series had to be  
186 investigated (and usually removed) because they artificially inflated the nowcasts/forecasts. These data  
187 issues required us to monitor the model output closely and modify the code as needed.

188         In early July 2022, reporting of mpox cases to CDC started to lag in some jurisdictions, especially  
189 those most affected by the outbreak. These few jurisdictions were publicly reporting more cases on their  
190 websites than what CDC had received reports for. This led to a lengthy case reconciliation process during  
191 which case data uncertainty prevented it from being used for nowcasting/forecasting at the national level.  
192 Also in July, an increasing proportion of cases were reported with missing symptom onset dates (from  
193 26% to 53% for rash onset date between June 13 and July 5). To ensure each case had a date associated  
194 with it for plotting epidemic curves, a new event date field was created which we started using for  
195 nowcasting/forecasting. The new calculated date field selected the best available date among possible date  
196 fields based on the following priority, ordered from most to least preferable: orthopoxvirus test date, date  
197 of call to the call center, date the short CRF was created, and the long CRF timestamp (Figure S1). The  
198 date in which the record was created was least preferred due to artificial spikes in the time series caused  
199 by bulk uploading data. In September 2022, a different date was adopted by the response for reporting



200 case data. This date field was defined as the earliest among all available dates for a case including  
201 symptom onset, which facilitated improved visualization of epidemic curves. However, this new date  
202 presented challenges for its use in the EpiNow2 framework because the delay from symptom onset to this  
203 new date would have more variation than the delay using the original event date, including a delay of zero  
204 for some cases. Thus, we worked to create a new event date field specifically for nowcasting/forecasting  
205 which was similar to the original event date. The definition was expanded to include dates available in  
206 NNDSS data.

### 207 **Successes of nowcasting/forecasting**

208 During the case reconciliation process in July, publicly available data through health department  
209 websites was used for subnational analyses [e.g., California (28) and New York City (29)]. We used  
210 WebPlotDigitizer (30) to extract time series data from pdfs when the underlying data were not available  
211 for download.

212 In October, we updated estimates of the serial interval for rash onset of 7.0 days (95% CrI 5.8 –  
213 8.4) from 40 case pairs and incubation period for rash onset of 7.5 days (95% CrI 6.0 – 9.8) from 35 U.S.  
214 case-patients and used those as model inputs for EpiNow2 (31). These data were obtained through the  
215 collaboration of several U.S. jurisdictions on a special study. The estimated serial interval for the 2022  
216 outbreak was on the lower end of the historical range observed in the Democratic Republic of Congo (7 –  
217 23 days) (24).

### 218 **Adapting model output and communicating nowcasts/forecasts**

219 We adapted the presentation of our results for a scientific/technical audience and the general  
220 public. The default plots from EpiNow2 included three panels: cases by date of report, cases by date of  
221 infection, and  $R_t$ . Green represented estimates based on complete data, orange represented estimates based  
222 on partial data, and purple represented the forecast (the default is seven days). Gray bars in the top panel  
223 showed the actual time series of reported cases, while gray bars in the middle panel showed the back-  
224 calculated infection time series. For the Technical Reports, Situational Reports, and response updates  
225 meetings, we removed the middle panel (Figure 1) (26). For the website, we only showed  $R_t$ , removed the

226 forecast, and removed the 20% credible intervals to minimize confusion (Figure 2) (27). We included a  
227 simple description of the plot that could be understood by non-experts. In accordance with CDC's Data  
228 Modernization Initiative, a national effort aimed at modernizing state and national core data and  
229 surveillance infrastructure (32), data for the underlying plots were made available for download as  
230 comma-separated values (csv) files with the Technical Reports.

231 Sub-national analyses revealed some differences between regions regarding the start of the  
232 outbreak, when it peaked, and how long it lasted (Figures 3 – 4). For example, Figure 4 demonstrates a  
233 later introduction date and slightly longer tail for Texas compared to other jurisdictions.

### 234 **Performance assessment**

235 The GLM had lower WIS compared to EpiNow2 for early phase of the outbreak (Table 1);  
236 however, during all other phases, EpiNow2 had a slight advantage. The relative WIS was 0.89 over all  
237 eight time points considered, indicating that EpiNow2 had on average 11% less probabilistic error than  
238 the GLM.

239 EpiNow2 had lower MAE than the GLM for six out of eight time points, but performance was  
240 similar: the relative MAE was 0.96. In other words, EpiNow2 had only 4% less point error than the GLM.

241 Overall, predictions were moderately well calibrated. For the 90% PI, EpiNow2 achieved  
242 coverage rates within 10% of the desired coverage level for seven out of eight time points compared to six  
243 out of eight for the GLM. For the 50% PI, EpiNow2 achieved coverage rates within 10% of the desired  
244 coverage level for only two out of eight time points compared to five out of eight for the GLM.

245 Qualitative results of the nowcasts/forecasts are shown in Figure S2. The 90% CrIs from  
246 EpiNow2 were very wide for the early phase of the outbreak, while the GLM had large uncertainty  
247 around the outbreak's peak. Both models underestimated reported mpox cases for the seventh time point  
248 on October 11 which could be due to a discrepancy in the data available at the time versus the ground-  
249 truth data (Figure S3). This time point had the lowest PI coverage rates.

### 250 **Discussion**

251 We performed nowcasting/forecasting to inform the U.S. response to the 2022 mpox outbreak in  
252 real-time. Validation showed that the method implemented in EpiNow2 predicted case counts reasonably  
253 well, but improvements are needed around key time periods such as the outbreak's peak. One reason that  
254 the nowcasts/forecasts did not always align with reality is because the definition of event date changed  
255 over time, while the study data were constructed the most recent version of the event date field. We found  
256 a higher WIS for EpiNow2 in the early phase of the outbreak compared to the GLM which could be due  
257 to choices of priors for parameters (e.g., wide intervals for  $R_t$ ).

258 Subnational analyses allowed us to better understand the spatial heterogeneity of the epidemic  
259 which may be attributed to differences between jurisdictions in terms of composition (e.g., population age  
260 structure, density, and contact patterns) and public health activities (e.g., vaccination, surveillance  
261 methods, frequency of testing) (33) as well as the timing and frequency of case reporting. One limitation  
262 of nowcasting/forecasting at the subregional or jurisdictional level is that the effects of bulk uploads are  
263 more apparent, resulting in greater uncertainty (wider credible intervals). Another limitation is that  
264 movement between jurisdictions could have a greater impact on subnational estimates, as mobility is not  
265 accounted for in our approach. Finally, some jurisdictions stopped reporting rash onset date, which  
266 decreased the sample size available for estimating the reporting delay distribution over time.

### 267 *Data Quality*

268 Nowcasting/forecasting methods perform best when the underlying surveillance data are accurate,  
269 timely, and complete, but they are often sub-optimal and variable as the outbreak evolves; while data may  
270 improve as an outbreak progresses, they may re-deteriorate once the outbreak slows and intensity of effort  
271 is low. Fortunately, the quality and frequency of data improved over the course of the U.S. mpox  
272 outbreak. Communicating with specific jurisdictions about our priority dates for modeling improved data  
273 quality. These prompts to the jurisdictions need to be continued regularly throughout the outbreak. Close  
274 collaboration between epidemiologists/modelers and informaticians, including the use of an issue tracking  
275 system in DCIPHER, also facilitated quick investigation and resolution of data errors.

### 276 *EpiNow2 Limitations*

277           The main limitation of EpiNow2 is its steep learning curve due to limited documentation of  
278 package functions and few reports of its application to other outbreaks. Increasing commenting in the  
279 code, creating more tutorials or vignettes, and developing a graphical user interface could help.

280           Another limitation is the long computing time required for the analyses. We were able to increase  
281 computational efficiency by running the model on multiple cores in parallel, but the processing time  
282 became particularly cumbersome if an analysis needed to be repeated. In the future, cloud-based  
283 computing could be used to obtain more consistent and faster model run times.

284           There were also instances of unusually long run times whereby the first two Markov chain Monte  
285 Carlo (MCMC) chains performed as expected, but subsequent chains never finished processing. Some  
286 MCMC convergence issues were resolved by reducing the parameter fitting period (e.g., truncating the  
287 beginning of the time series). One study reported that EpiNow2 estimates are more reliable when case  
288 numbers at each time step are large and there are at least 14 timepoints without zeroes (34). Large daily  
289 fluctuations and limited case counts could substantially affect model estimates, which should be  
290 interpreted with caution.

291           Another limitation is that the method we used does not account for under-ascertainment, which  
292 occurs when not all infections are diagnosed and reported as cases of the disease to the surveillance  
293 system. The under-ascertainment rate is needed to understand the true burden of disease caused by the  
294 outbreak; however, current estimates for the U.S. mpox outbreak are lacking. Indirect evidence from a  
295 recent modeling study (35) suggests that 65% of mpox infections were diagnosed and reported in  
296 Washington, D.C. However, the model was not designed to measure the under-ascertainment rate (Patrick  
297 Clay, personal communication, March 10, 2023), and this quantity should be assessed by other methods  
298 (e.g., models specifically designed to assess under-ascertainment, serological surveys, and community-  
299 based surveys).

### 300 ***Strategies for Forecasting the Next Outbreak***

301           For the next outbreak, it is important for CDC to develop strategies for regularly capturing and  
302 storing snapshots of surveillance data which remain easily accessible for systematic analysis. For routine

303 case-based surveillance of notifiable diseases, such as rabies, most analyses are performed only after the  
304 data have undergone a rigorous and routine reconciliation and closeout process by data submitters with  
305 further validation by CDC surveillance epidemiologists; however, timely outbreak response decision  
306 support does not allow for such processes. Instead, jurisdictions are asked to submit available case data in  
307 near real-time and submit additional data or corrections to data entry errors as time and resources permit.  
308 Snapshots of the surveillance data were saved in an ad hoc manner (by exporting data on a particular day  
309 and saving a csv file locally), and as a consequence, a complete history of the data is not available,  
310 especially around key points in the outbreak, such as the peak. A complete history would help to  
311 understand key delay distributions and other quirks (e.g., backfilling and revision of reference dates)  
312 involved in the data-generating process. Understanding the data generating process is crucial for the  
313 improvement of methods and tools for nowcasting/forecasting and aligns with one of the five priorities of  
314 CDC's Data Modernization Initiative (Accelerating Data for Action: Tapping into more data sources,  
315 promoting health equity, and increasing capacities for scalable outbreak response, forecasting, and  
316 predictive analytics) (32). In the future, the process of saving snapshots of the data could be automated.

317       Ensemble models have been used for a variety of infectious disease outbreaks, such as COVID-  
318 19 (15, 36), Zika (37), influenza (38), and Ebola (39). Ensembles combine predictions from several  
319 models that use different methodology and sometimes input data. Because some models overpredict,  
320 while others underpredict, ensemble models often outperform individual models over time. In the future,  
321 we may consider using at least two simpler models and comparing them.

322       One potentially useful addition to EpiNow2 and other currently available tools for  
323 nowcasting/forecasting outbreaks would be flexibility in handling dates. We frequently encountered  
324 missing dates for cases in the mpox surveillance data. Ideally, a method or tool would be able to keep  
325 track of multiple dates for a case and estimate missing dates based on the full distribution of dates across  
326 all cases. EpiNowcast is a new hierarchical nowcasting package that enables more flexibility in adjusting  
327 for truncated data (40). Novel nowcasting approaches use hierarchical generalized additive models, which  
328 can provide even more flexibility to modify the model in real-time to the evolving data environment (41).

329 Another improvement would be to reduce the time required to run the analyses. Rather than focusing on  
330 the efficiency of the MCMC algorithm, computation time could be reduced if the model only needed to be  
331 run on the new data. Finally, the imputed time series of cases by symptom onset date would be a useful  
332 data visualization output that is not currently available in EpiNow2. As described above, defining the date  
333 field for the presentation of epidemic curves was a challenge in the mpox outbreak and having an imputed  
334 symptom onset date for each case would have been useful for comparison purposes.

335 CFA played an important advisory role in our nowcasting/forecasting efforts. CFA produces  
336 models and forecasts to characterize the state of an outbreak and its course, inform public health decision  
337 makers on potential consequences of deploying control measures, and support innovation to continuously  
338 improve the science of outbreak analytics and modeling (42). In the future, CFA plans to create new tools  
339 for outbreak analysis and modeling. CFA could also serve as a link between CDC modelers and  
340 jurisdictions with modeling capacity to share experiences and code. Technical Reports represent a new  
341 way for CDC to share timely information with the federal government, state and local leaders, and  
342 scientists in academia and industry. Technical Reports have been well received within and outside CDC  
343 (43-45) and their publication aligns with CDC's current restructuring efforts aimed at making the agency  
344 more response ready, including sharing science and data faster (46).

## 345 **Conclusion**

346 Real-time estimation of  $R_t$  as well as nowcasting/forecasting is one method for determining the  
347 extent to which current public health measures are effective and/or need to be modified but is subject to  
348 limitations. The quality and timeliness of reported data pose challenges to these analyses. Ease of use,  
349 model computing time, and ability to handle multiple dates are priorities for consideration in the  
350 development of future nowcasting/forecasting tools. A naïve model may be superior to a complex one,  
351 such as EpiNow2, during the early phase of an outbreak when data scarcity causes  $R_t$  to be largely  
352 unconstrained, especially once reporting delays are considered. Future outbreak response activities could  
353 be enhanced through inclusion of clear and consistent communication about modeling outputs as well as  
354 close collaboration between modeling and informatics/data teams.



356 **Tables**

357 **Table 1.** Evaluation of short-term (one-week-ahead) forecasts of reported mpox cases during the 2022 U.S. outbreak. For WIS, bold indicates  
 358 where one model performed better than the other.

| Forecast date        | Outbreak phase     | EpiNow2         |                 |              |       | Bayesian GLM with negative binomial |                 |             |      |
|----------------------|--------------------|-----------------|-----------------|--------------|-------|-------------------------------------|-----------------|-------------|------|
|                      |                    | 90% PI coverage | 50% PI coverage | WIS          | MAE   | 90% PI coverage                     | 50% PI coverage | WIS         | MAE  |
| Monday, June 13      | Early              | 1               | 0.71            | 33.8         | 4.3   | 0.86                                | 0.57            | <b>6.4</b>  | 5.1  |
| Monday, June 27      | Early              | 0.86            | 0               | 34.0         | 29.0  | 0.86                                | 0.14            | <b>24.7</b> | 26.9 |
| Tuesday, July 5      | Exponential growth | 0.86            | 0.71            | <b>35.6</b>  | 32.4  | 1                                   | 0.57            | 38.5        | 34.1 |
| Wednesday, July 27   | Peak               | 1               | 0.57            | <b>137.0</b> | 107.9 | 1                                   | 0.57            | 184.3       | 94.4 |
| Tuesday, September 6 | Decline            | 0.86            | 0.71            | <b>107.6</b> | 84.3  | 0.86                                | 0.43            | 117.1       | 86.8 |
| Monday, September 19 | Decline            | 0.86            | 0.43            | <b>61.2</b>  | 52.4  | 0.71                                | 0.43            | 81.8        | 65.9 |
| Tuesday, October 11  | Decline            | 0.43            | 0.29            | <b>30.6</b>  | 33.4  | 0.57                                | 0.14            | 38.3        | 41.9 |
| Monday, December 5   | Decline            | 1               | 0.71            | <b>4.3</b>   | 3.1   | 1                                   | 0.71            | 6.4         | 4.6  |

359 PI: prediction interval; WIS: weighted interval score; MAE: mean absolute error; GLM: generalized linear model



## 360 **Figures**

361 **Figure 1.** Effective reproduction number estimates for the U.S. 2022 mpox outbreak intended for a  
362 technical/scientific audience. The top panel shows estimates of cases by date of report with actual cases  
363 shown by gray bars. The bottom panel shows estimates of the effective reproduction number by date. In  
364 all panels, shaded regions reflect 90%, 50%, and 20% credible intervals in order from lightest to darkest.  
365 Green shows estimates, red shows estimates based on partial data, and purple shows forecasts. Event date  
366 is determined by a hierarchy across the different data streams where priority is given to diagnosis date,  
367 orthopoxvirus test date, orthopoxvirus test confirmation date, case investigation start date, orthopoxvirus  
368 sample collection date, date of call to CDC call center, report date (to public health department, county, or  
369 state), date CDC announced case, and the date the case was entered into DCIPHER, in that order.

370  
371 **Figure 2.** Effective reproduction number ( $R_t$ ) estimates for the U.S. 2022 mpox outbreak intended for the  
372 general public. The graph shows the  $R_t$  estimation over time based on complete data (gray) or partial data  
373 (blue). The most recent data are considered incomplete due to delays in reporting mpox cases. As a result,  
374 there is more uncertainty associated with the most recent  $R_t$  estimates.  $R_t > 1$  means the epidemic is  
375 growing.  $R_t < 1$  means the epidemic is shrinking. Shading represents the 50% and 90% credible intervals  
376 (uncertainty in the estimates)

377  
378 **Figure 3.** Effective reproduction number estimates for the 2022 mpox outbreak in four U.S. Census  
379 regions. The left panels show estimates of cases by date of report with actual cases shown by gray bars.  
380 The right panels show estimates of the effective reproduction number by date. In all panels, shaded  
381 regions reflect 90%, 50%, and 20% credible intervals in order from lightest to darkest. Green shows  
382 estimates, red shows estimates based on partial data, and purple shows forecasts. Event date is determined  
383 by a hierarchy across the different data streams where priority is given to diagnosis date, orthopoxvirus  
384 test date, orthopoxvirus test confirmation date, case investigation start date, orthopoxvirus sample  
385 collection date, date of call to CDC call center, report date (to public health department, county, or state),  
386 date CDC announced case, and the date the case was entered into DCIPHER, in that order.

387  
388 **Figure 4.** Effective reproduction number estimates of the 2022 mpox outbreak for the six jurisdictions in  
389 the U.S. with the highest case counts. The left panels show estimates of cases by date of report with actual  
390 cases shown by gray bars. The right panels show estimates of the effective reproduction number by date.  
391 In all panels, shaded regions reflect 90%, 50%, and 20% credible intervals in order from lightest to  
392 darkest. Green shows estimates, red shows estimates based on partial data, and purple shows forecasts.  
393 Event date is determined by a hierarchy across the different data streams where priority is given to  
394 diagnosis date, orthopoxvirus test date, orthopoxvirus test confirmation date, case investigation start date,  
395 orthopoxvirus sample collection date, date of call to CDC call center, report date (to public health  
396 department, county, or state), date CDC announced case, and the date the case was entered into  
397 DCIPHER, in that order.

398 **Data availability**

399 Data and code to run the nowcasts/forecasts and perform model validation will be available on GitHub  
400 following publication in a peer-reviewed journal.

401

402 **Acknowledgements**

403 We thank all public health professionals involved in reporting mpox cases to CDC. We also acknowledge  
404 the Mpox Response Data Analytics and Visualization Task Force Informatics Team for data management  
405 and support, and we thank Dr. Sam Abbott for helpful discussions about EpiNow2 methods.

406

407 **Declaration of interest**

408 The authors declare the following financial interests/personal relationships which may be considered as  
409 potential competing interests: Kelly Charniga reports a relationship with Systems Planning and Analysis  
410 Inc that includes: consulting or advisory.

411

412 **Disclaimer**

413 The findings and conclusions in this report are those of the authors and do not necessarily represent the  
414 official position of the Centers for Disease Control and Prevention, U.S. Department of Health and  
415 Human Services.

416

417 **Ethics statement**

418 This activity was reviewed by CDC and was conducted consistent with applicable federal law and CDC  
419 policy (45 C.F.R. part 46, 21 C.F.R. part 56; 42 U.S.C. Sect. 241(d); 5 U.S.C. Sect. 552a; 44 U.S.C. Sect.  
420 3501 et seq).

421

422 **Funding**

423 No specific funding was obtained for this work.

424

## 425 **Author contributions**

426 Conceptualization (KC, YN), data curation (KC, JA), formal analysis (KC, ZJM), investigation (KC,  
427 ZJM), methodology (KC, ZJM, JA), project administration (KC), software (KC, ZJM, NBM), supervision  
428 (JA, YN, IHS), validation (KC, ZJM), visualization (KC, ZJM), writing – original draft preparation (KC,  
429 ZJM), writing – review & editing (KC, ZJM, NBM, JA, YN, IHS).

430

## 431 **References**

- 432 1. World Health Organization. WHO Director-General declares the ongoing monkeypox outbreak a  
433 Public Health Emergency of International Concern 2022 [updated July 23, 2022. Available from:  
434 [https://www.who.int/europe/news/item/23-07-2022-who-director-general-declares-the-ongoing-](https://www.who.int/europe/news/item/23-07-2022-who-director-general-declares-the-ongoing-monkeypox-outbreak-a-public-health-event-of-international-concern)  
435 [monkeypox-outbreak-a-public-health-event-of-international-concern](https://www.who.int/europe/news/item/23-07-2022-who-director-general-declares-the-ongoing-monkeypox-outbreak-a-public-health-event-of-international-concern).
- 436 2. U.S. Centers for Disease Control and Prevention. 2022 Monkeypox Outbreak Global Map 2022  
437 [updated November 15, 2022. Available from:  
438 <https://www.cdc.gov/poxvirus/monkeypox/response/2022/world-map.html>.
- 439 3. Beer E, Rao V. A systematic review of the epidemiology of human monkeypox outbreaks and  
440 implications for outbreak strategy. *PLoS Negl Trop Dis*. 2019;13(10):e0007791.
- 441 4. U.S. Centers for Disease Control and Prevention. Signs and Symptoms 2022 [updated October  
442 18, 2022. Available from: <https://www.cdc.gov/poxvirus/monkeypox/symptoms/index.html>.
- 443 5. WHO/ECDC. Interim advice for public health authorities on summer events during the  
444 monkeypox outbreak in Europe, 2022 2022 [updated June 14, 2022. Available from:  
445 [https://www.ecdc.europa.eu/sites/default/files/documents/Interim-advice-for-public-health-](https://www.ecdc.europa.eu/sites/default/files/documents/Interim-advice-for-public-health-authorities-on-summer-events-mpx.pdf)  
446 [authorities-on-summer-events-mpx.pdf](https://www.ecdc.europa.eu/sites/default/files/documents/Interim-advice-for-public-health-authorities-on-summer-events-mpx.pdf).
- 447 6. UK Health Security Agency. Investigation into monkeypox outbreak in England: technical briefing  
448 1 2022 [updated September 23, 2022. Available from:  
449 [https://www.gov.uk/government/publications/monkeypox-outbreak-technical-briefings/investigation-](https://www.gov.uk/government/publications/monkeypox-outbreak-technical-briefings/investigation-into-monkeypox-outbreak-in-england-technical-briefing-1#:~:text=Without%20correcting%20for%20right%2Dtruncation,8.9)%2C%20see%20Figure%202a)  
450 [into-monkeypox-outbreak-in-england-technical-briefing-](https://www.gov.uk/government/publications/monkeypox-outbreak-technical-briefings/investigation-into-monkeypox-outbreak-in-england-technical-briefing-1#:~:text=Without%20correcting%20for%20right%2Dtruncation,8.9)%2C%20see%20Figure%202a)  
451 [1#:~:text=Without%20correcting%20for%20right%2Dtruncation,8.9\)%2C%20see%20Figure%202a](https://www.gov.uk/government/publications/monkeypox-outbreak-technical-briefings/investigation-into-monkeypox-outbreak-in-england-technical-briefing-1#:~:text=Without%20correcting%20for%20right%2Dtruncation,8.9)%2C%20see%20Figure%202a).
- 452 7. Thompson J, McClure R, Scott N, Hellard M, Abey Suriya R, Vidanaarachchi R, et al. A framework  
453 for considering the utility of models when facing tough decisions in public health: a guideline for policy-  
454 makers. *Health Research Policy and Systems*. 2022;20:107.
- 455 8. Buchwald A, Adams J, Bortz D, Carlton E. Infectious Disease Transmission Models to Predict,  
456 Evaluate, and Improve Understanding of COVID-19 Trajectory and Interventions. *Annals of the American*  
457 *Thoracic Society*. 2020;17(10):1204-6.
- 458 9. Madewell Z, Pastore Y Piontti A, Zhang Q, Burton N, Yang Y, Longini I, et al. Using simulated  
459 infectious disease outbreaks to inform site selection and sample size for individually randomized vaccine  
460 trials during an ongoing epidemic. *Clinical Trials*. 2021;18(5):630-8.

- 461 10. Lloyd-Smith J, Funk S, McLean A, Riley S, Wood J. Nine challenges in modelling the emergence of  
462 novel pathogens. *Epidemics*. 2015;10:35-9.
- 463 11. Madewell Z, Dean N, Berlin J, Coplan P, Davis K, Struchiner C, et al. Challenges of evaluating and  
464 modelling vaccination in emerging infectious diseases. *Epidemics*. 2021;37:100506.
- 465 12. Chakraborty T, Ghosh I, Mahajan T, Arora T. Nowcasting of COVID-19 Confirmed Cases:  
466 Foundations, Trends, and Challenges. In: Azar A, Hassanien A, editors. *Modeling, Control and Drug  
467 Development for COVID-19 Outbreak Prevention*. Studies in Systems, Decision and Control: Springer,  
468 Cham; 2022.
- 469 13. Abbott S, Hellewell J, Thompson R, Sherratt K, Gibbs H, Bosse N, et al. Estimating the time-  
470 varying reproduction number of SARS-CoV-2 using national and subnational case counts [version 2; peer  
471 review: 1 approved, 1 approved with reservations]. *Wellcome Open Research*. 2020;5:112.
- 472 14. Cori A, Ferguson N, Fraser C, Cauchemez S. A New Framework and Software to Estimate Time-  
473 Varying Reproduction Numbers During Epidemics. *American Journal of Epidemiology*. 2013;178(9):1505-  
474 12.
- 475 15. Cramer E, Ray E, Lopez V, Bracher J, Brennen A, Rivadeneira A, et al. Evaluation of individual and  
476 ensemble probabilistic forecasts of COVID-19 mortality in the United States. *PNAS*.  
477 2022;119(15):e2113561119.
- 478 16. Arslan S, Ozdemir M, Ucar A. Nowcasting and Forecasting the Spread of COVID-19 and  
479 Healthcare Demand in Turkey, a Modeling Study. *Front Public Health*. 2021;8:575145.
- 480 17. Birrell P, Blake J, van Leeuwen E, Gent N, De Angelis D. Real-time nowcasting and forecasting of  
481 COVID-19 dynamics in England: the first wave. *Philos Trans R Soc Lond B Biol Sci*.  
482 2021;376(1829):20200279.
- 483 18. Spreco A, Jöud A, Eriksson O, Soltesz K, Källström R, Dahlström Ö, et al. Nowcasting (Short-Term  
484 Forecasting) of COVID-19 Hospitalizations Using Syndromic Healthcare Data, Sweden, 2020. *Emerg Infect  
485 Dis*. 2022;28:564-71.
- 486 19. Biggerstaff M, Slayton R, Johansson M, Butler J. Improving Pandemic Response: Employing  
487 Mathematical Modeling to Confront Coronavirus Disease 2019. *Clinical Infectious Diseases*.  
488 2021;74(5):913-7.
- 489 20. U.S. Department of Health and Human Services. Privacy Impact Assessment 2020 [updated  
490 March 26, 2020. Available from: <https://www.hhs.gov/sites/default/files/cdc-dciphcr-whr.pdf>.
- 491 21. Cori A, Cauchemez S, Ferguson N, Fraser C, Dahlgvist E, Demarsh P, et al. EpiEstim: Estimate  
492 Time Varying Reproduction Numbers from Epidemic Curves. 2.2-4 ed. CRAN2021.
- 493 22. Jombart T, Cori A, Nouvellet P, Skaup J, Kamvar Z, Taylor T. earlyR: Estimation of Transmissibility  
494 in the Early Stages of a Disease Outbreak. 0.0.5 ed: CRAN; 2020.
- 495 23. Abbott S, Hellewell J, Sherratt K, Gostic K, Hickson J, Badr H, et al. EpiNow2: Estimate real-time  
496 case counts and time-varying epidemiological parameters. 1.3.2 ed: EpiForecasts; 2021.
- 497 24. Fenner F, Henderson D, Arita I, Jezek Z, Ladnyi I. *Smallpox and its Eradication*1988. Available  
498 from: <https://apps.who.int/iris/handle/10665/39485>.
- 499 25. Nash R, Nouvellet P, Cori A. Real-time estimation of the epidemic reproduction number: Scoping  
500 review of the applications and challenges. *PLOS Digit Health*. 2022;1(6):e0000052.
- 501 26. U.S. Centers for Disease Control and Prevention. Monkeypox Technical Reports 2022 [updated  
502 October 27, 2022. Available from: [https://www.cdc.gov/poxvirus/monkeypox/cases-data/technical-  
503 report.html](https://www.cdc.gov/poxvirus/monkeypox/cases-data/technical-report.html).
- 504 27. U.S. Centers for Disease Control and Prevention. Outbreak Reproduction Number Estimates  
505 2022 [updated November 14, 2022. Available from: [https://www.cdc.gov/poxvirus/monkeypox/cases-  
506 data/case-nowcasting.html](https://www.cdc.gov/poxvirus/monkeypox/cases-data/case-nowcasting.html).
- 507 28. California Department of Public Health. Monkeypox Data in California 2022 [updated November  
508 10, 2022. Available from: <https://www.cdph.ca.gov/Programs/CID/DCDC/Pages/Monkeypox-Data.aspx>.

- 509 29. New York City Department of Health and Mental Hygiene. 2022 Monkeypox Surveillance Data  
510 2022 [updated July 19, 2022. Available from:  
511 [https://www1.nyc.gov/assets/doh/downloads/pdf/monkeypox/data-daily-cases-demographics-](https://www1.nyc.gov/assets/doh/downloads/pdf/monkeypox/data-daily-cases-demographics-072122.pdf)  
512 [072122.pdf](https://www1.nyc.gov/assets/doh/downloads/pdf/monkeypox/data-daily-cases-demographics-072122.pdf).
- 513 30. Rohatgi A. WebPlotDigitizer. Vers. 4.5 ed. Pacifica, California, USA2021.
- 514 31. Madewell Z, Charniga K, Masters N, Asher J, Fahrenwald L, Still W, et al. Serial interval and  
515 incubation period estimates of monkeypox virus infection in 12 U.S. jurisdictions, May – August 2022.  
516 *Emerg Infect Dis.* 2023;29(4):818-21.
- 517 32. U.S. Centers for Disease Control and Prevention. What is the Data Modernization Initiative?  
518 2022 [updated October 11, 2022. Available from: [https://www.cdc.gov/surveillance/projects/dmi-](https://www.cdc.gov/surveillance/projects/dmi-initiative/index.html#:~:text=CDC%E2%80%99s%20Data%20Modernization%20Initiative%20%28DMI%29%20is%20at%20the,data%20reporting%2C%20management%2C%20and%20analytics%20across%20public%20health)  
519 [initiative/index.html#:~:text=CDC%E2%80%99s%20Data%20Modernization%20Initiative%20%28DMI%29%20is%20at%20the,data%20reporting%2C%20management%2C%20and%20analytics%20across%20pu-](https://www.cdc.gov/surveillance/projects/dmi-initiative/index.html#:~:text=CDC%E2%80%99s%20Data%20Modernization%20Initiative%20%28DMI%29%20is%20at%20the,data%20reporting%2C%20management%2C%20and%20analytics%20across%20public%20health)  
520 [blic%20health](https://www.cdc.gov/surveillance/projects/dmi-initiative/index.html#:~:text=CDC%E2%80%99s%20Data%20Modernization%20Initiative%20%28DMI%29%20is%20at%20the,data%20reporting%2C%20management%2C%20and%20analytics%20across%20public%20health).
- 521
- 522 33. De Nicola G, Schneble M, Kauermann G, Berger U. Regional now- and forecasting for data  
523 reported with delay: toward surveillance of COVID-19 infections. *Adv Stat Anal.* 2022;106(3):407-26.
- 524 34. Binny R, Lustig A, Hendy S, Maclaren O, Ridings K, Vattiato G, et al. Real-time estimation of the  
525 effective reproduction number of SARS-CoV-2 in Aotearoa New Zealand. *PeerJ.* 2022;10:e14119.
- 526 35. Clay P, Asher J, Carnes N, Copen C, Delaney K, Payne D, et al. Modelling the impact of  
527 vaccination and sexual behavior change on reported cases of mpox in Washington D.C. *medRxiv.* 2023.
- 528 36. Dean N, Pastore Y Piontti A, Madewell Z, Cummings D, Hitchings M, Joshi K, et al. Ensemble  
529 forecast modeling for the design of COVID-19 vaccine efficacy trials. *Vaccine.* 2020;38(46):7213-6.
- 530 37. Oidtman R, Omodei E, Kraemer M, Castañeda-Orjuela C, Cruz-Rivera E, Misnaza-Castrillón S, et  
531 al. Trade-offs between individual and ensemble forecasts of an emerging infectious disease. *Nature*  
532 *Communications.* 2021;12:5379.
- 533 38. Reich N, McGowan C, Yamana T, Tushar A, Ray E, Osthus D, et al. Accuracy of real-time multi-  
534 model ensemble forecasts for seasonal influenza in the U.S. *PLOS Computational Biology.*  
535 2019;15(11):e1007486.
- 536 39. Viboud C, Sun K, Gaffey R, Ajelli M, Fumanelli L, Merler S, et al. The RAPIDD ebola forecasting  
537 challenge: Synthesis and lessons learnt. *Epidemics.* 2018;22:13-21.
- 538 40. Abbott S, Lison A, Funk S. epinowcast: Flexible hierarchical nowcasting. Zenodo; 2021.
- 539 41. Overton C, Abbott S, Christie R, Cumming F, Day J, Jones O, et al. Nowcasting the 2022 mpox  
540 outbreak in England. *arXiv.* 2023.
- 541 42. U.S. Centers for Disease Control and Prevention. Center for Forecasting and Outbreak Analytics  
542 2022 [updated October 28, 2022. Available from: [https://www.cdc.gov/forecast-outbreak-](https://www.cdc.gov/forecast-outbreak-analysis/index.html)  
543 [analysis/index.html](https://www.cdc.gov/forecast-outbreak-analysis/index.html).
- 544 43. Daskalakis D. You know that you are a #publichealth nerd when you wake up on a gloomy  
545 Saturday to read @CDCgov
- 546 Twitter; 2022 [updated October 1, 2022. [Tweet]]. Available from:  
547 [https://twitter.com/dr\\_demetre/status/1576196874079735808?s=48&t=9NVB0dQPIU9S4J58AJJfw](https://twitter.com/dr_demetre/status/1576196874079735808?s=48&t=9NVB0dQPIU9S4J58AJJfw).
- 548 44. Fox S. These monkeypox technical reports from the CDC are [three fire emojis]: Twitter; 2022  
549 [updated November 8, 2022. [Tweet]]. Available from:  
550 <https://twitter.com/FoxandtheFlu/status/1589978622026461184>.
- 551 45. Rivers C. Changing trends in monkeypox epidemiology: Substack; 2022 [updated September 2,  
552 2022. Available from: [https://caitlinrivers.substack.com/p/changing-trends-in-monkeypox-](https://caitlinrivers.substack.com/p/changing-trends-in-monkeypox-epidemiology)  
553 [epidemiology](https://caitlinrivers.substack.com/p/changing-trends-in-monkeypox-epidemiology).

554 46. U.S. Centers for Disease Control and Prevention. CDC Moving Forward Summary Report 2022  
555 [updated September 1, 2022December 27, 2022]. Available from:  
556 <https://www.cdc.gov/about/organization/cdc-moving-forward-summary-report.html>.  
557

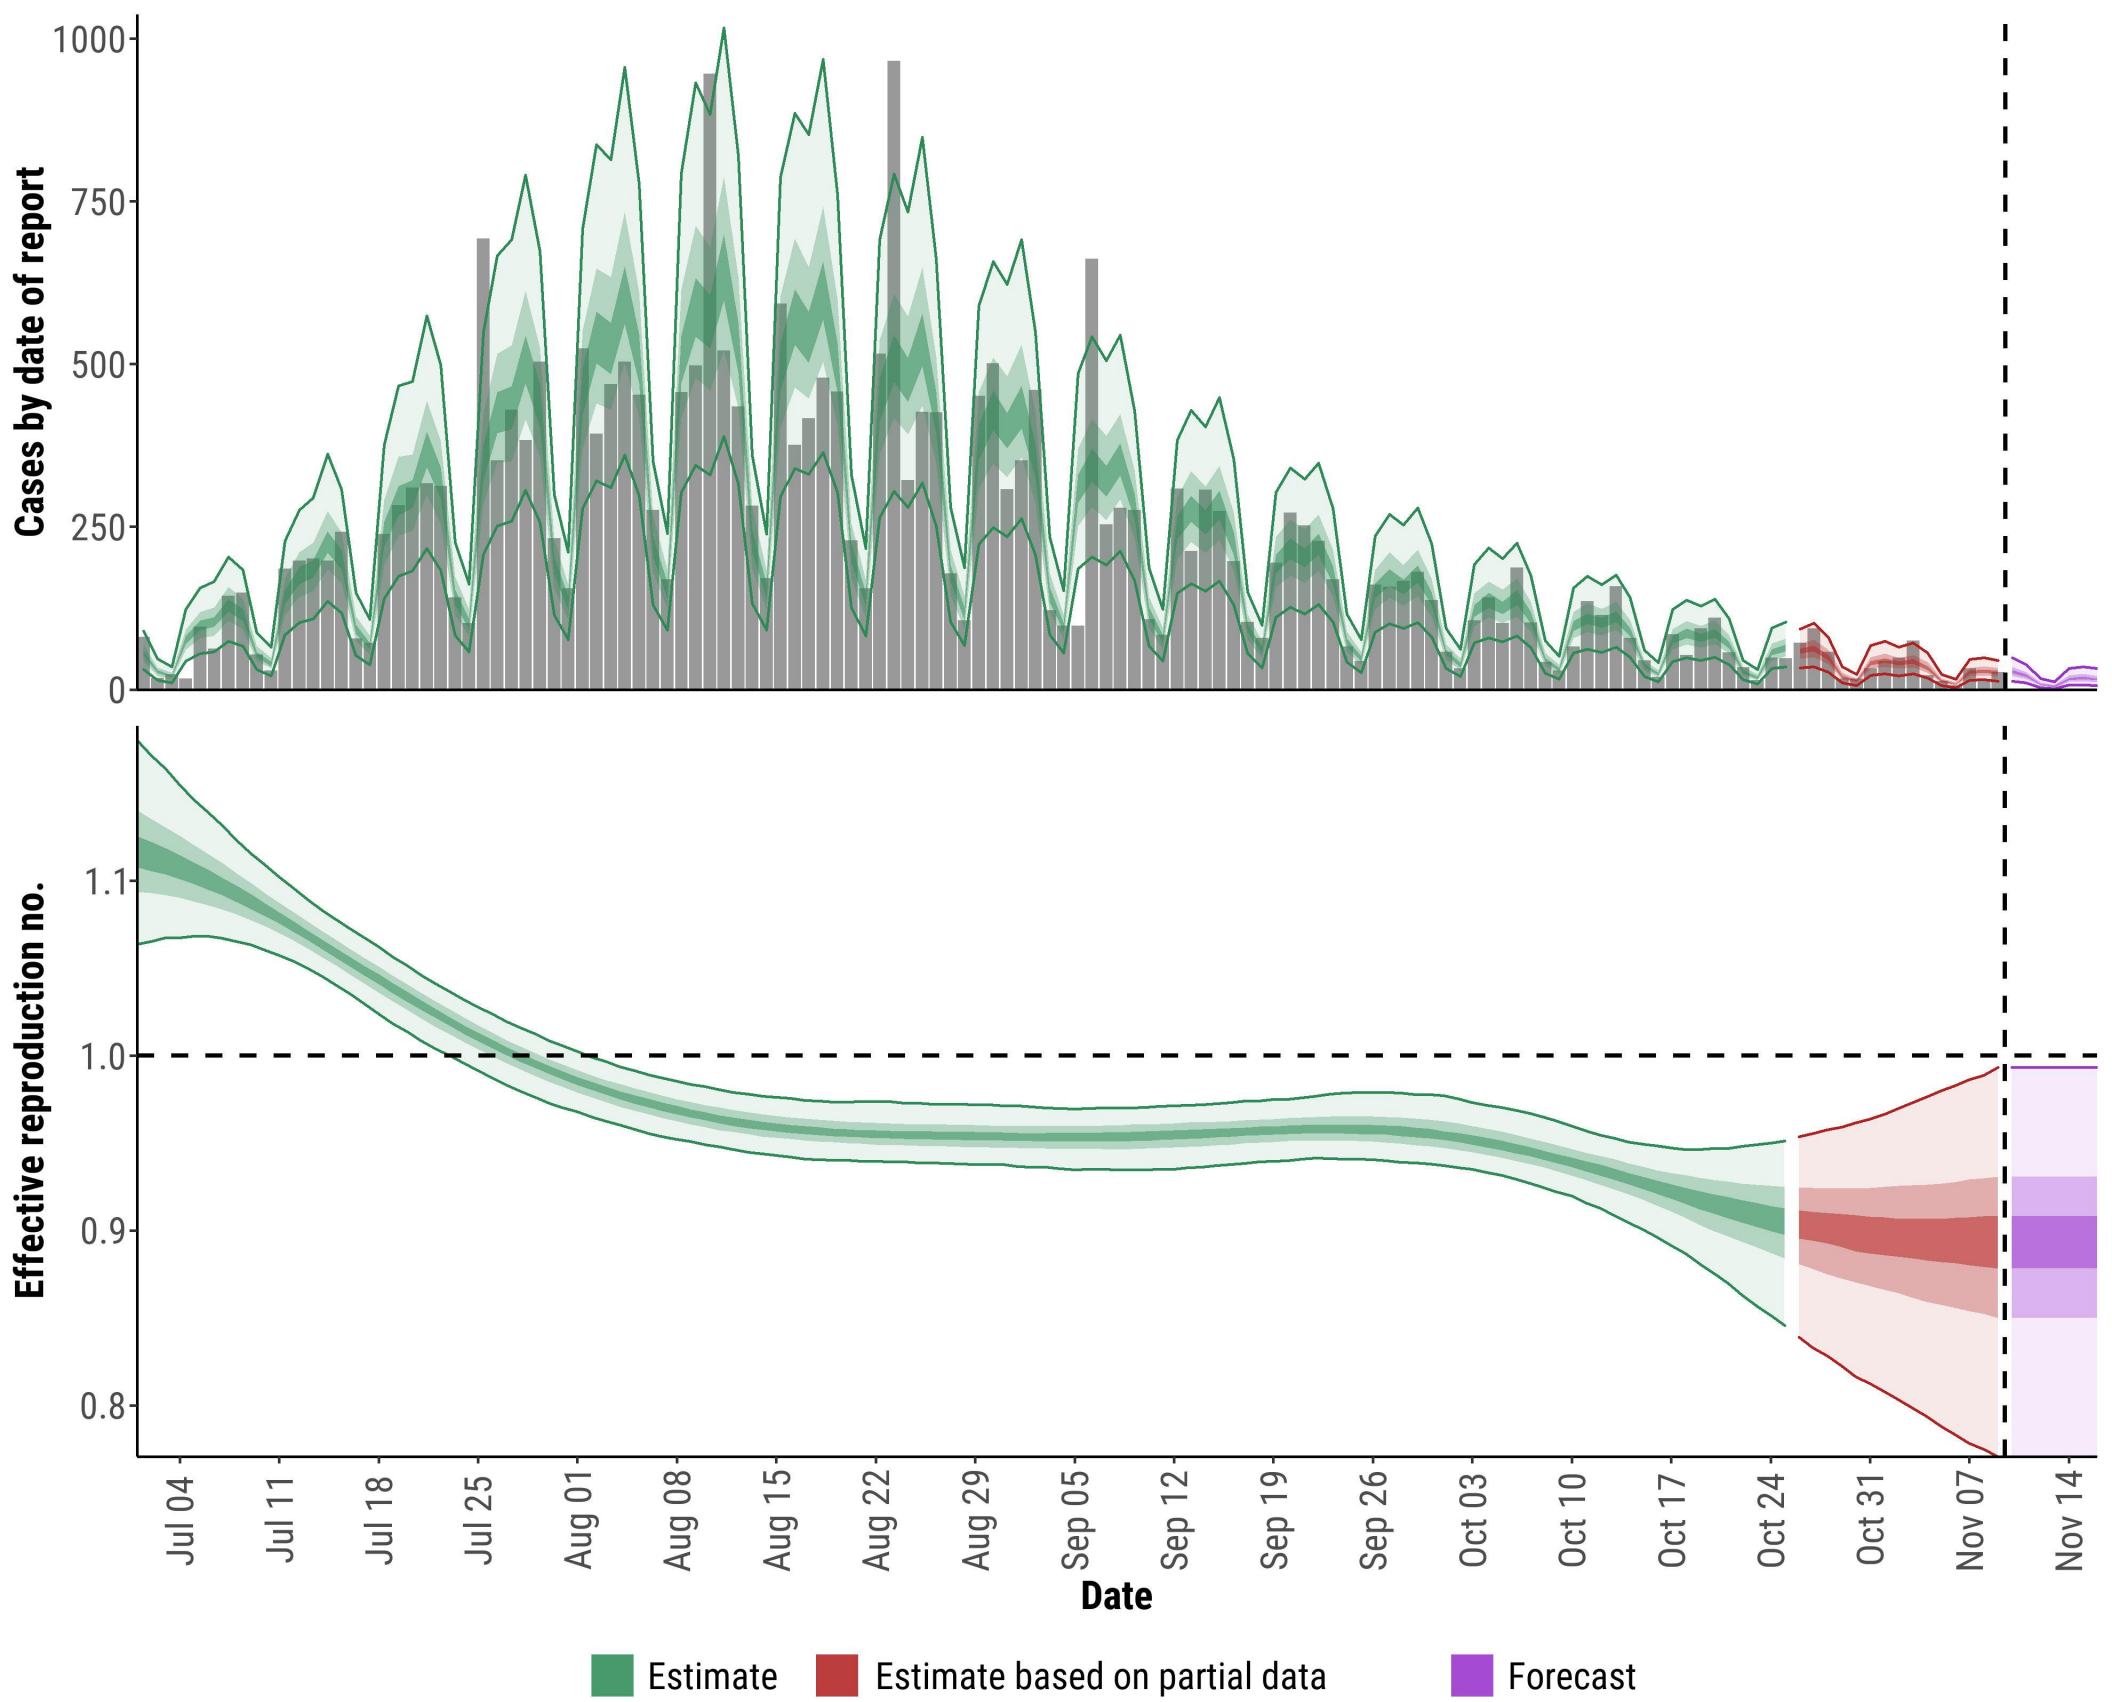

# Average number of secondary infections transmitted from a primary infection

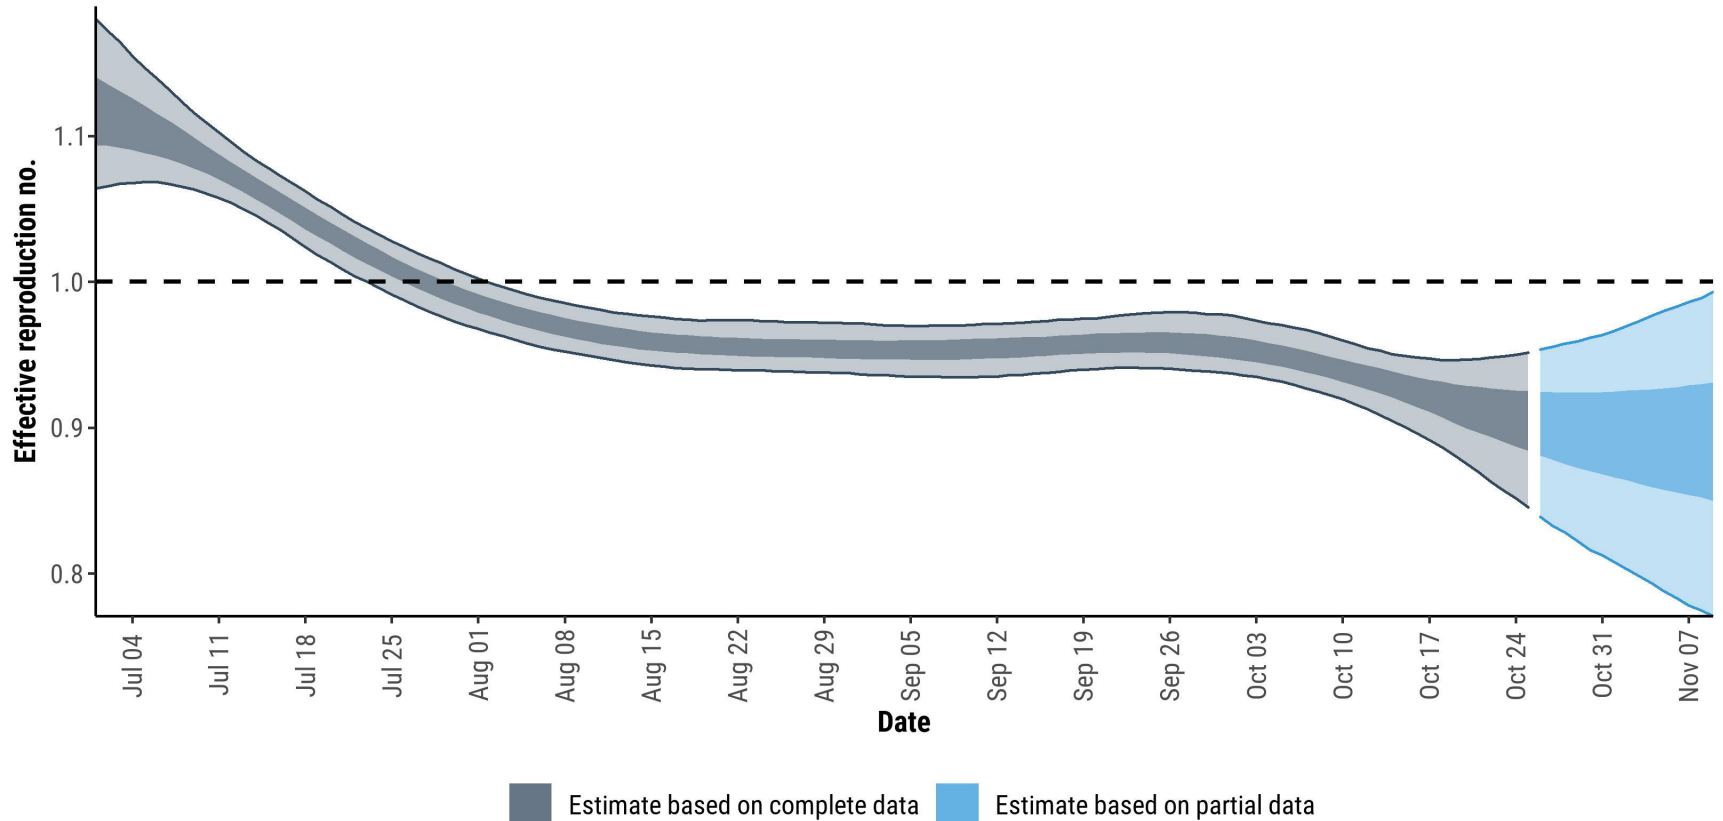



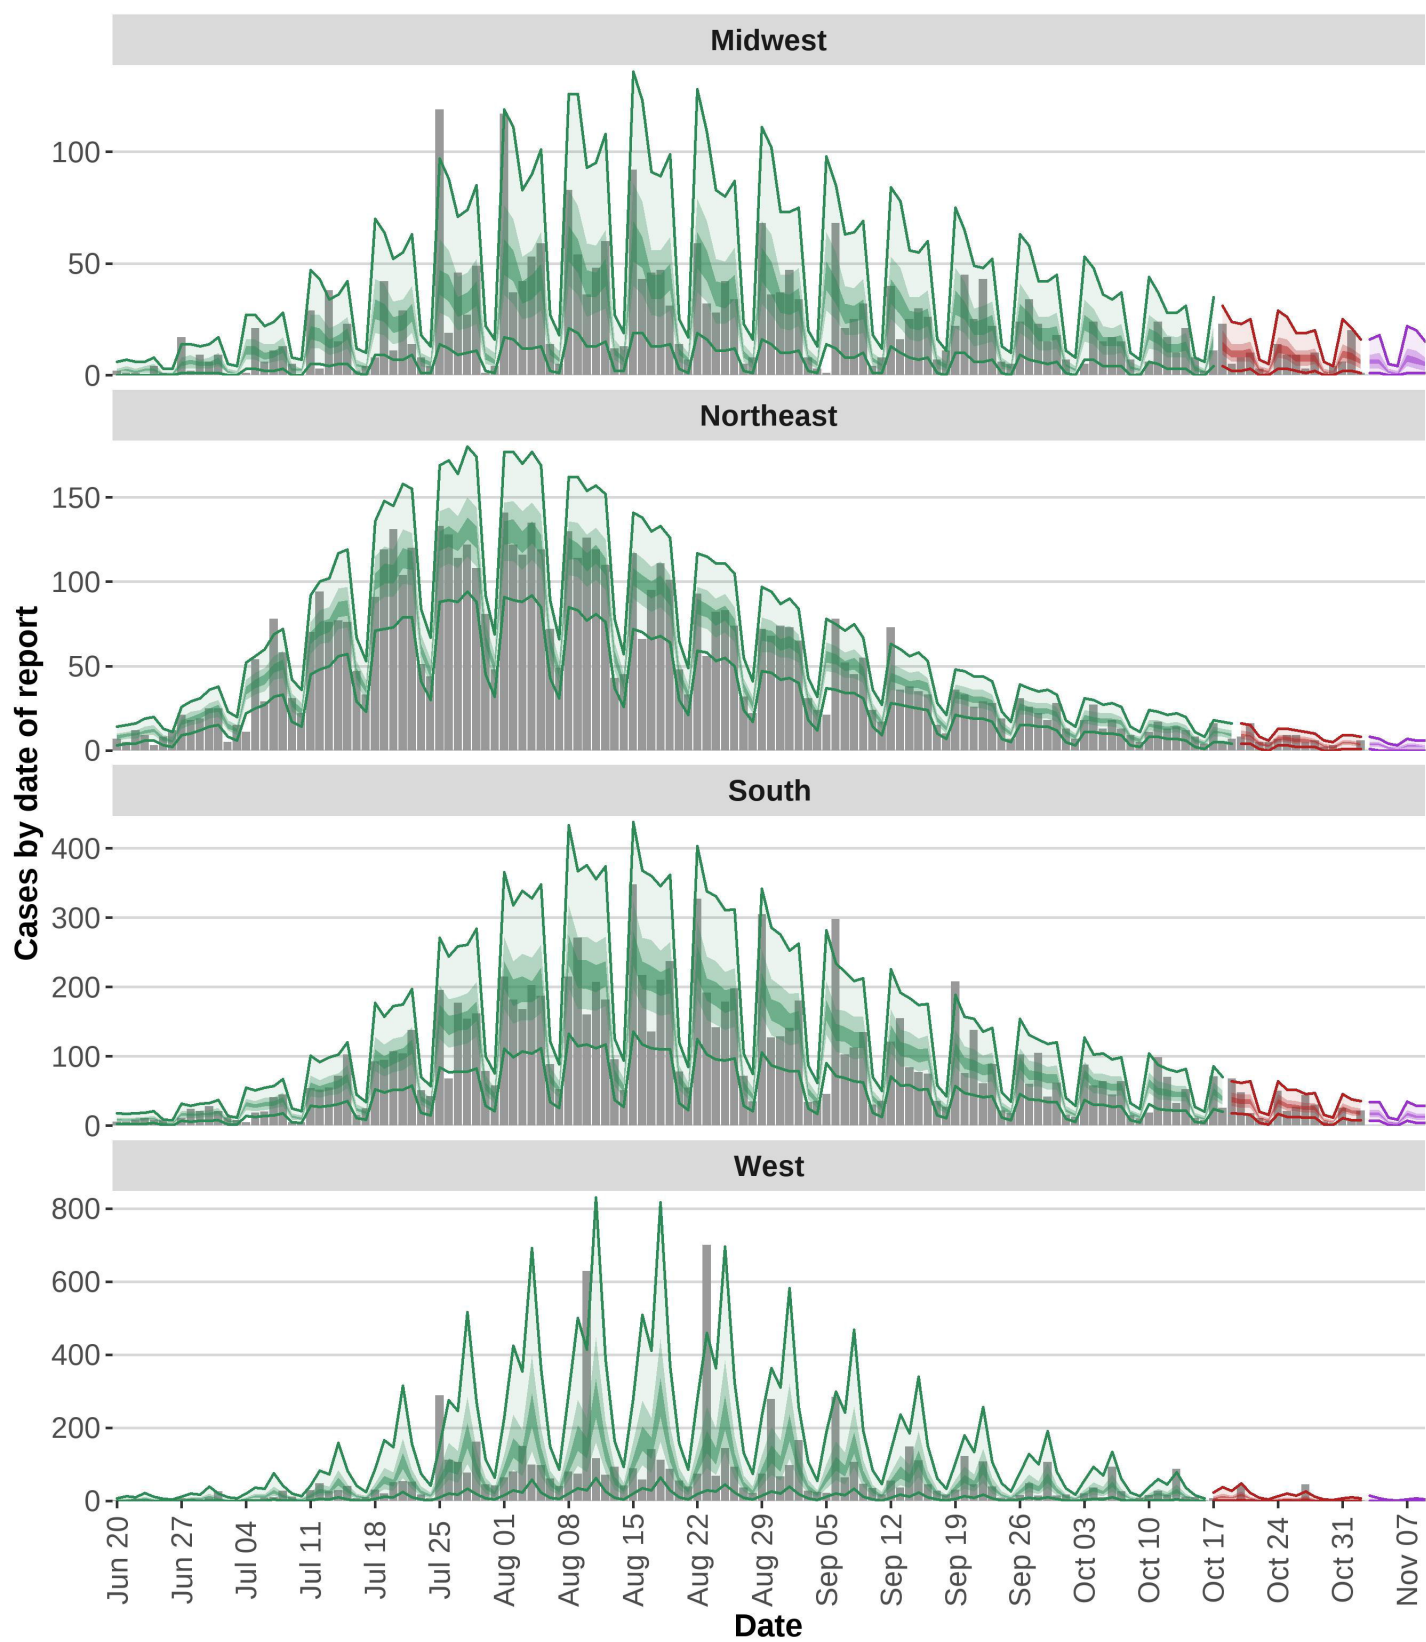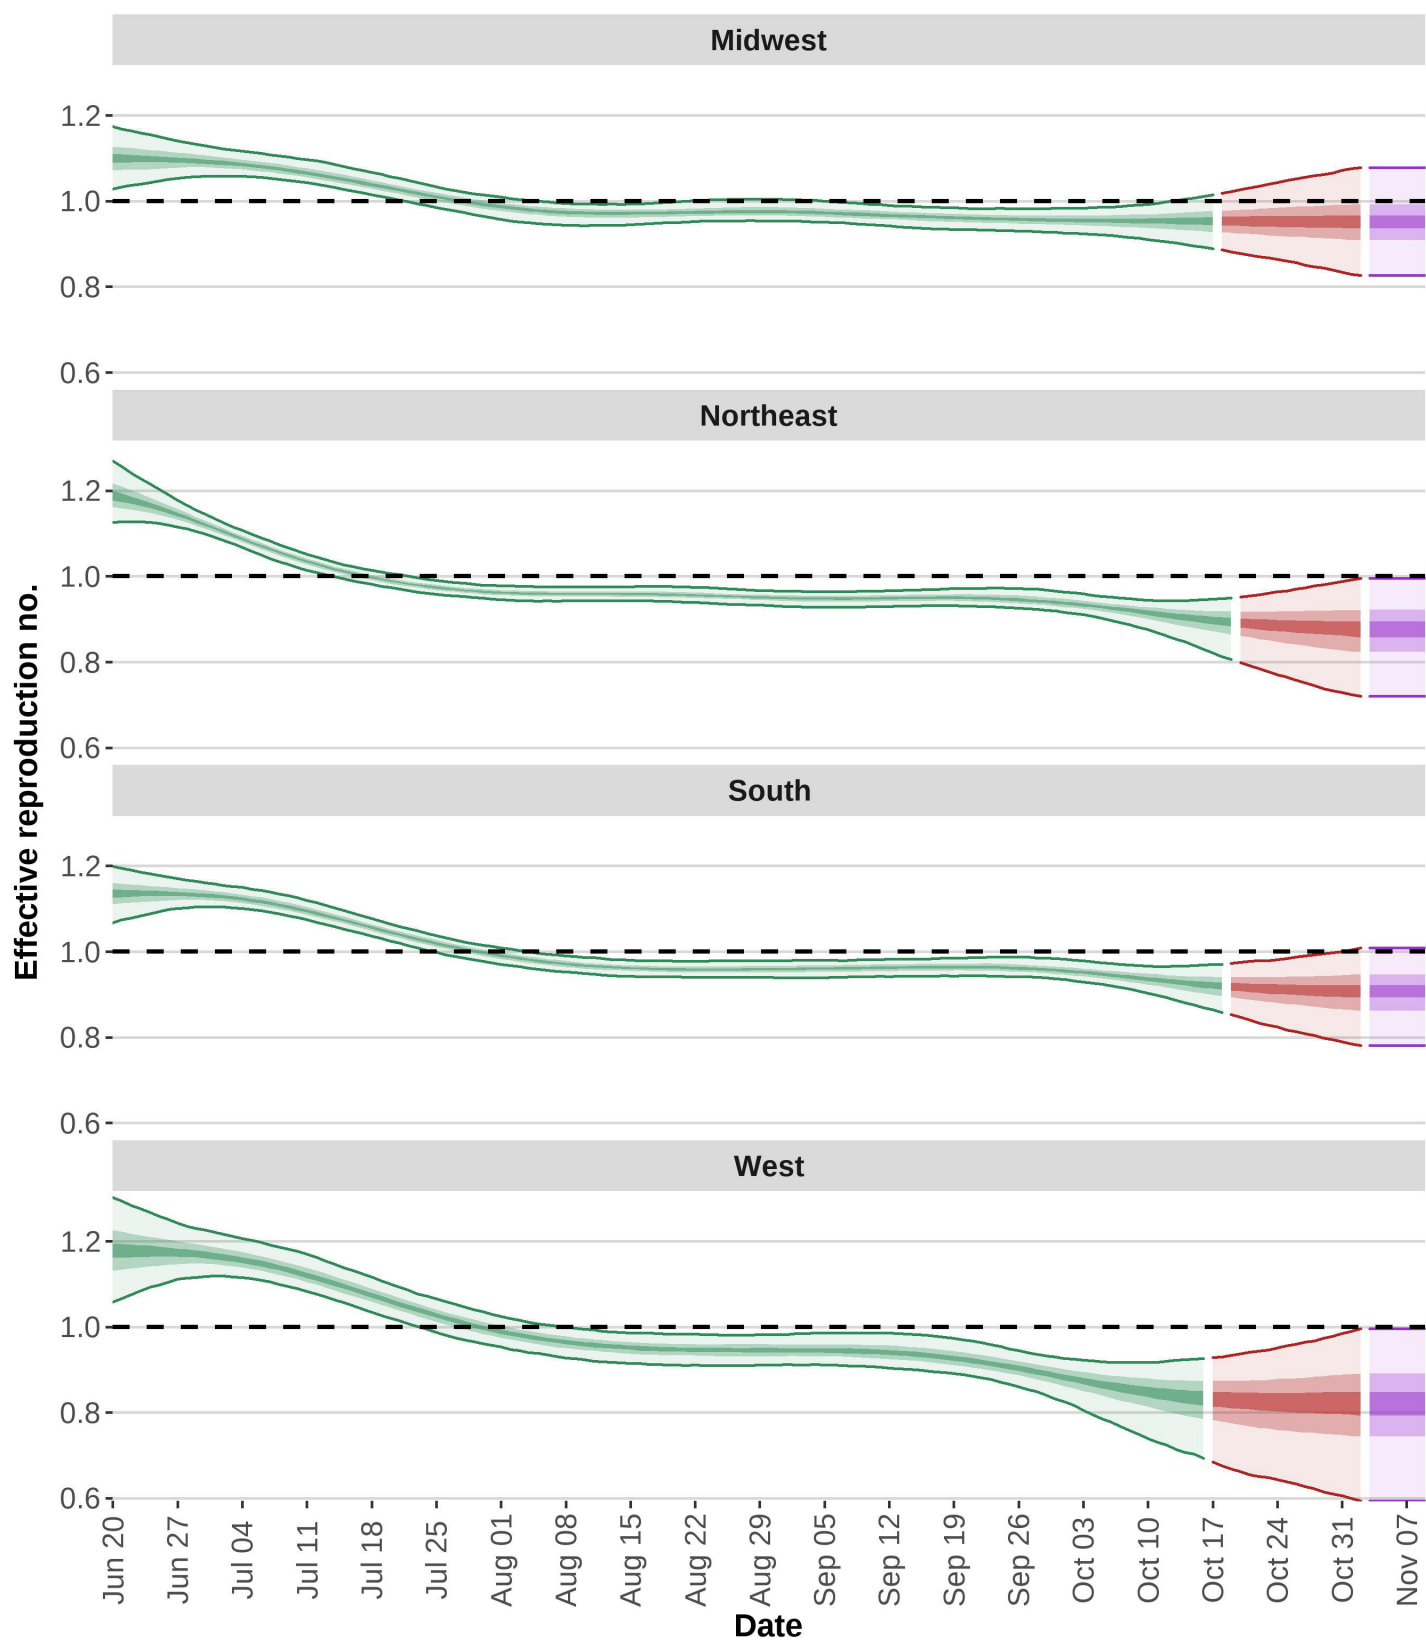

■ Estimate
 ■ Estimate based on partial data
 ■ Forecast

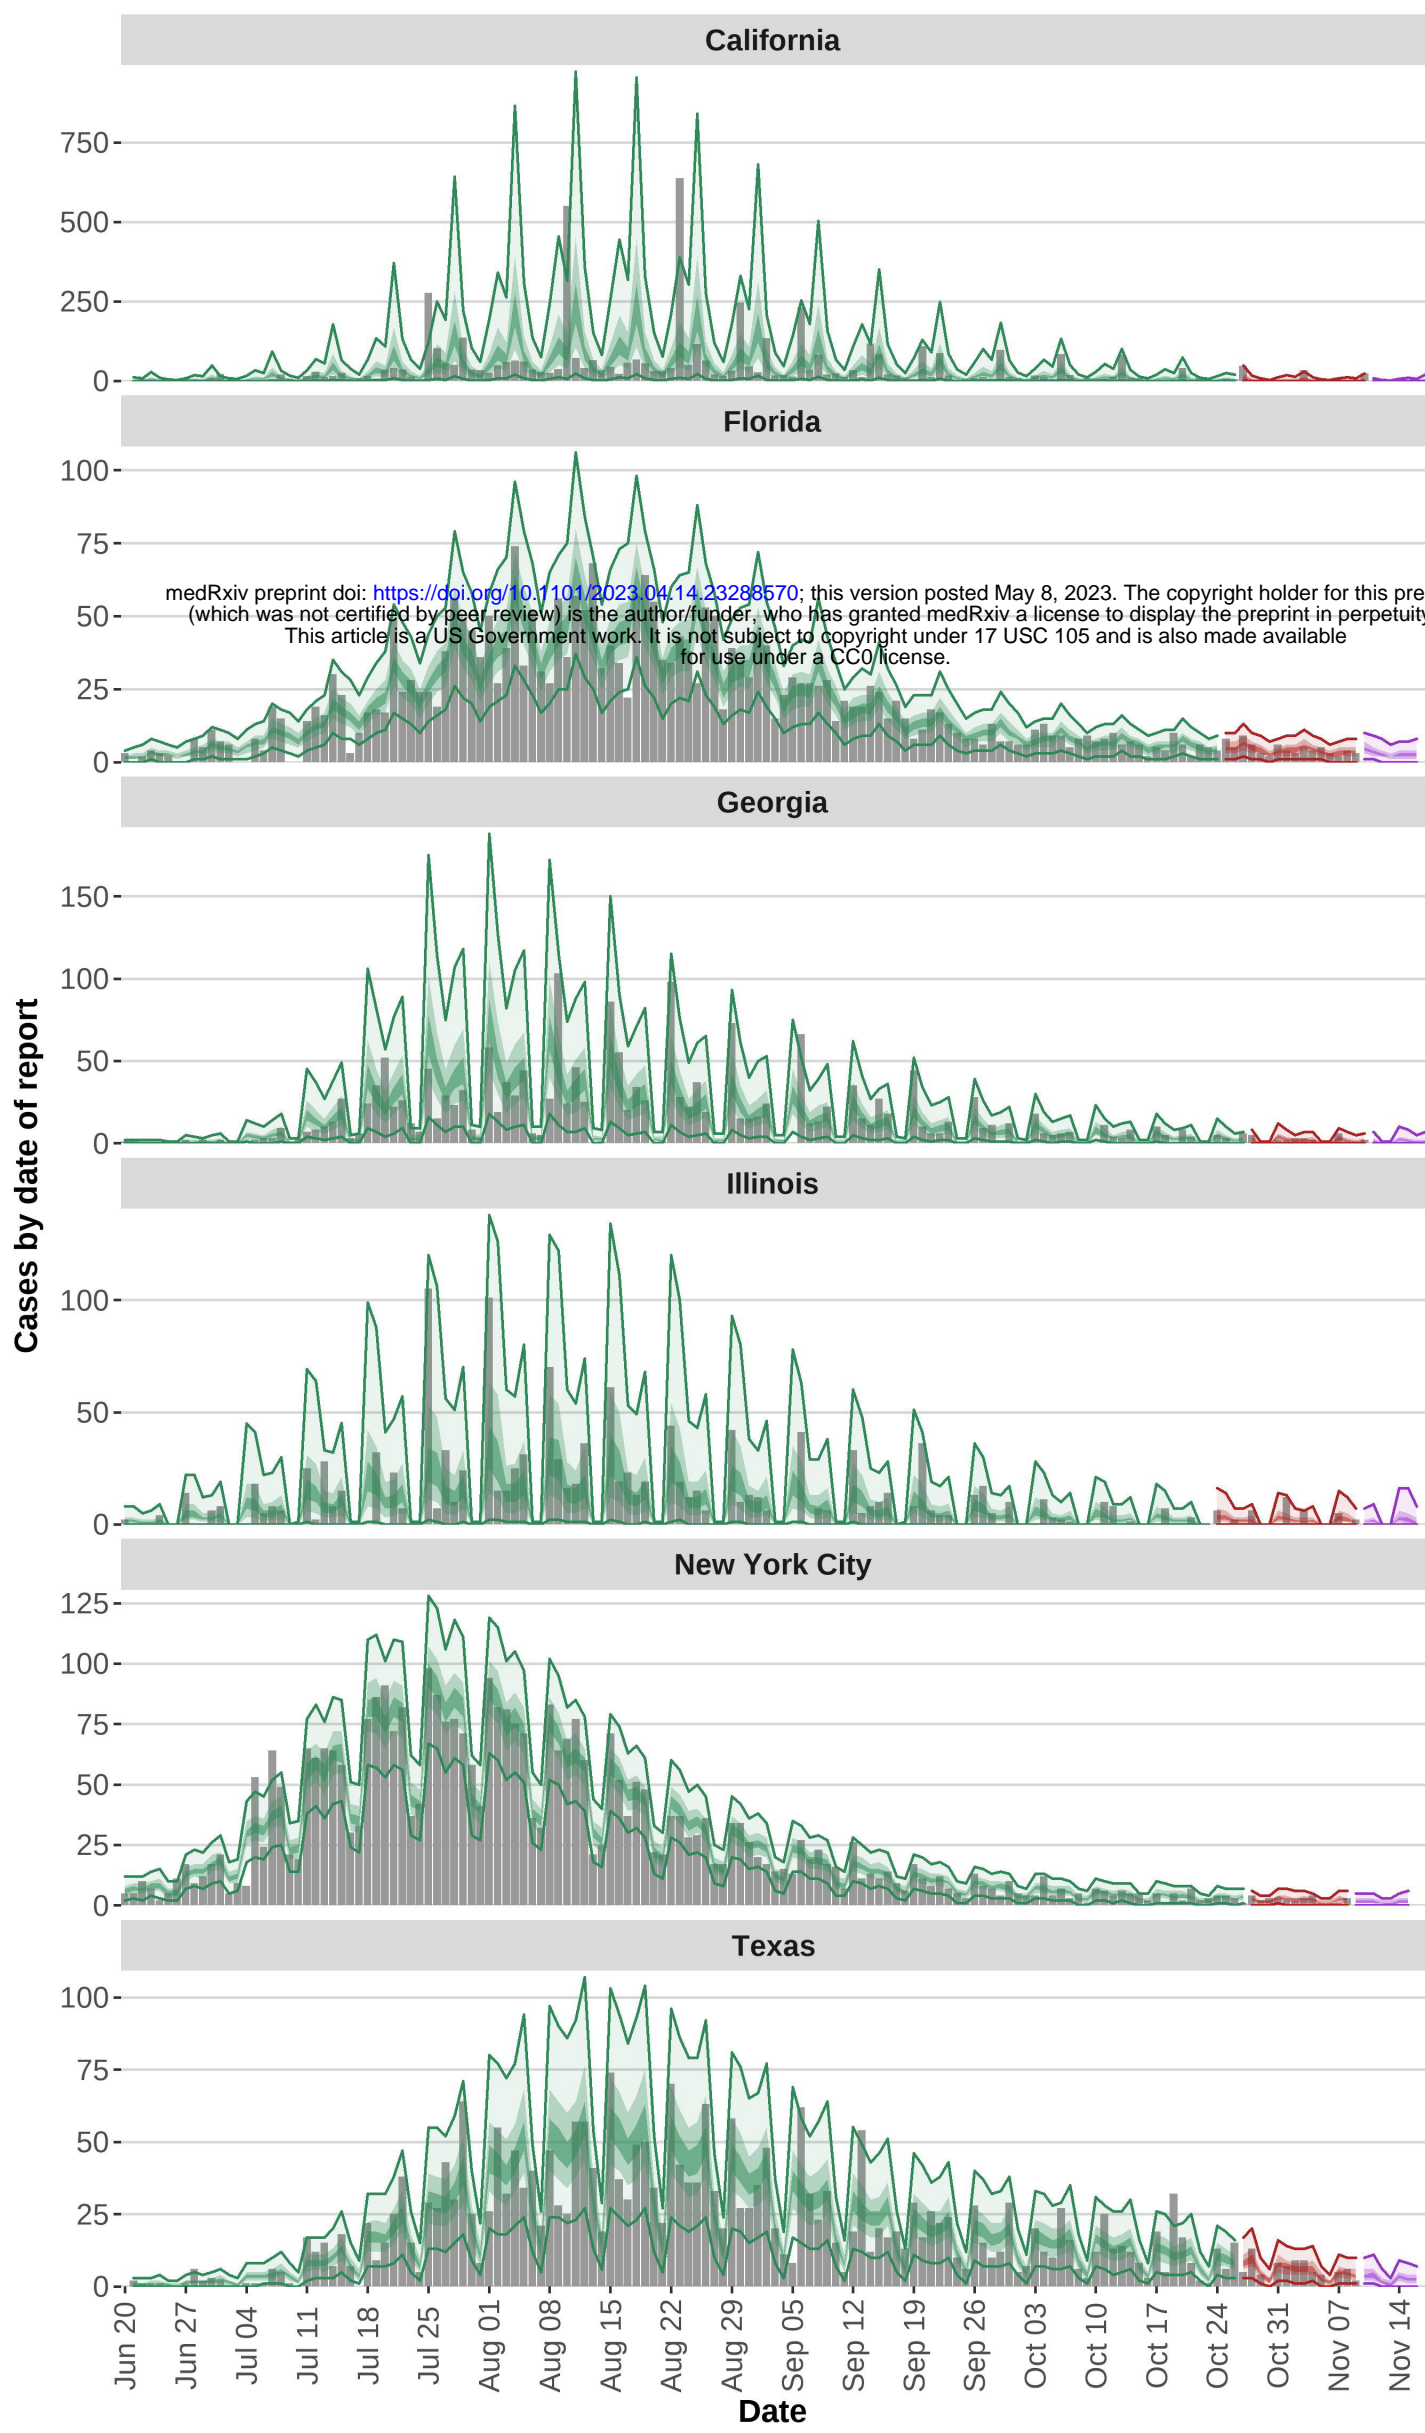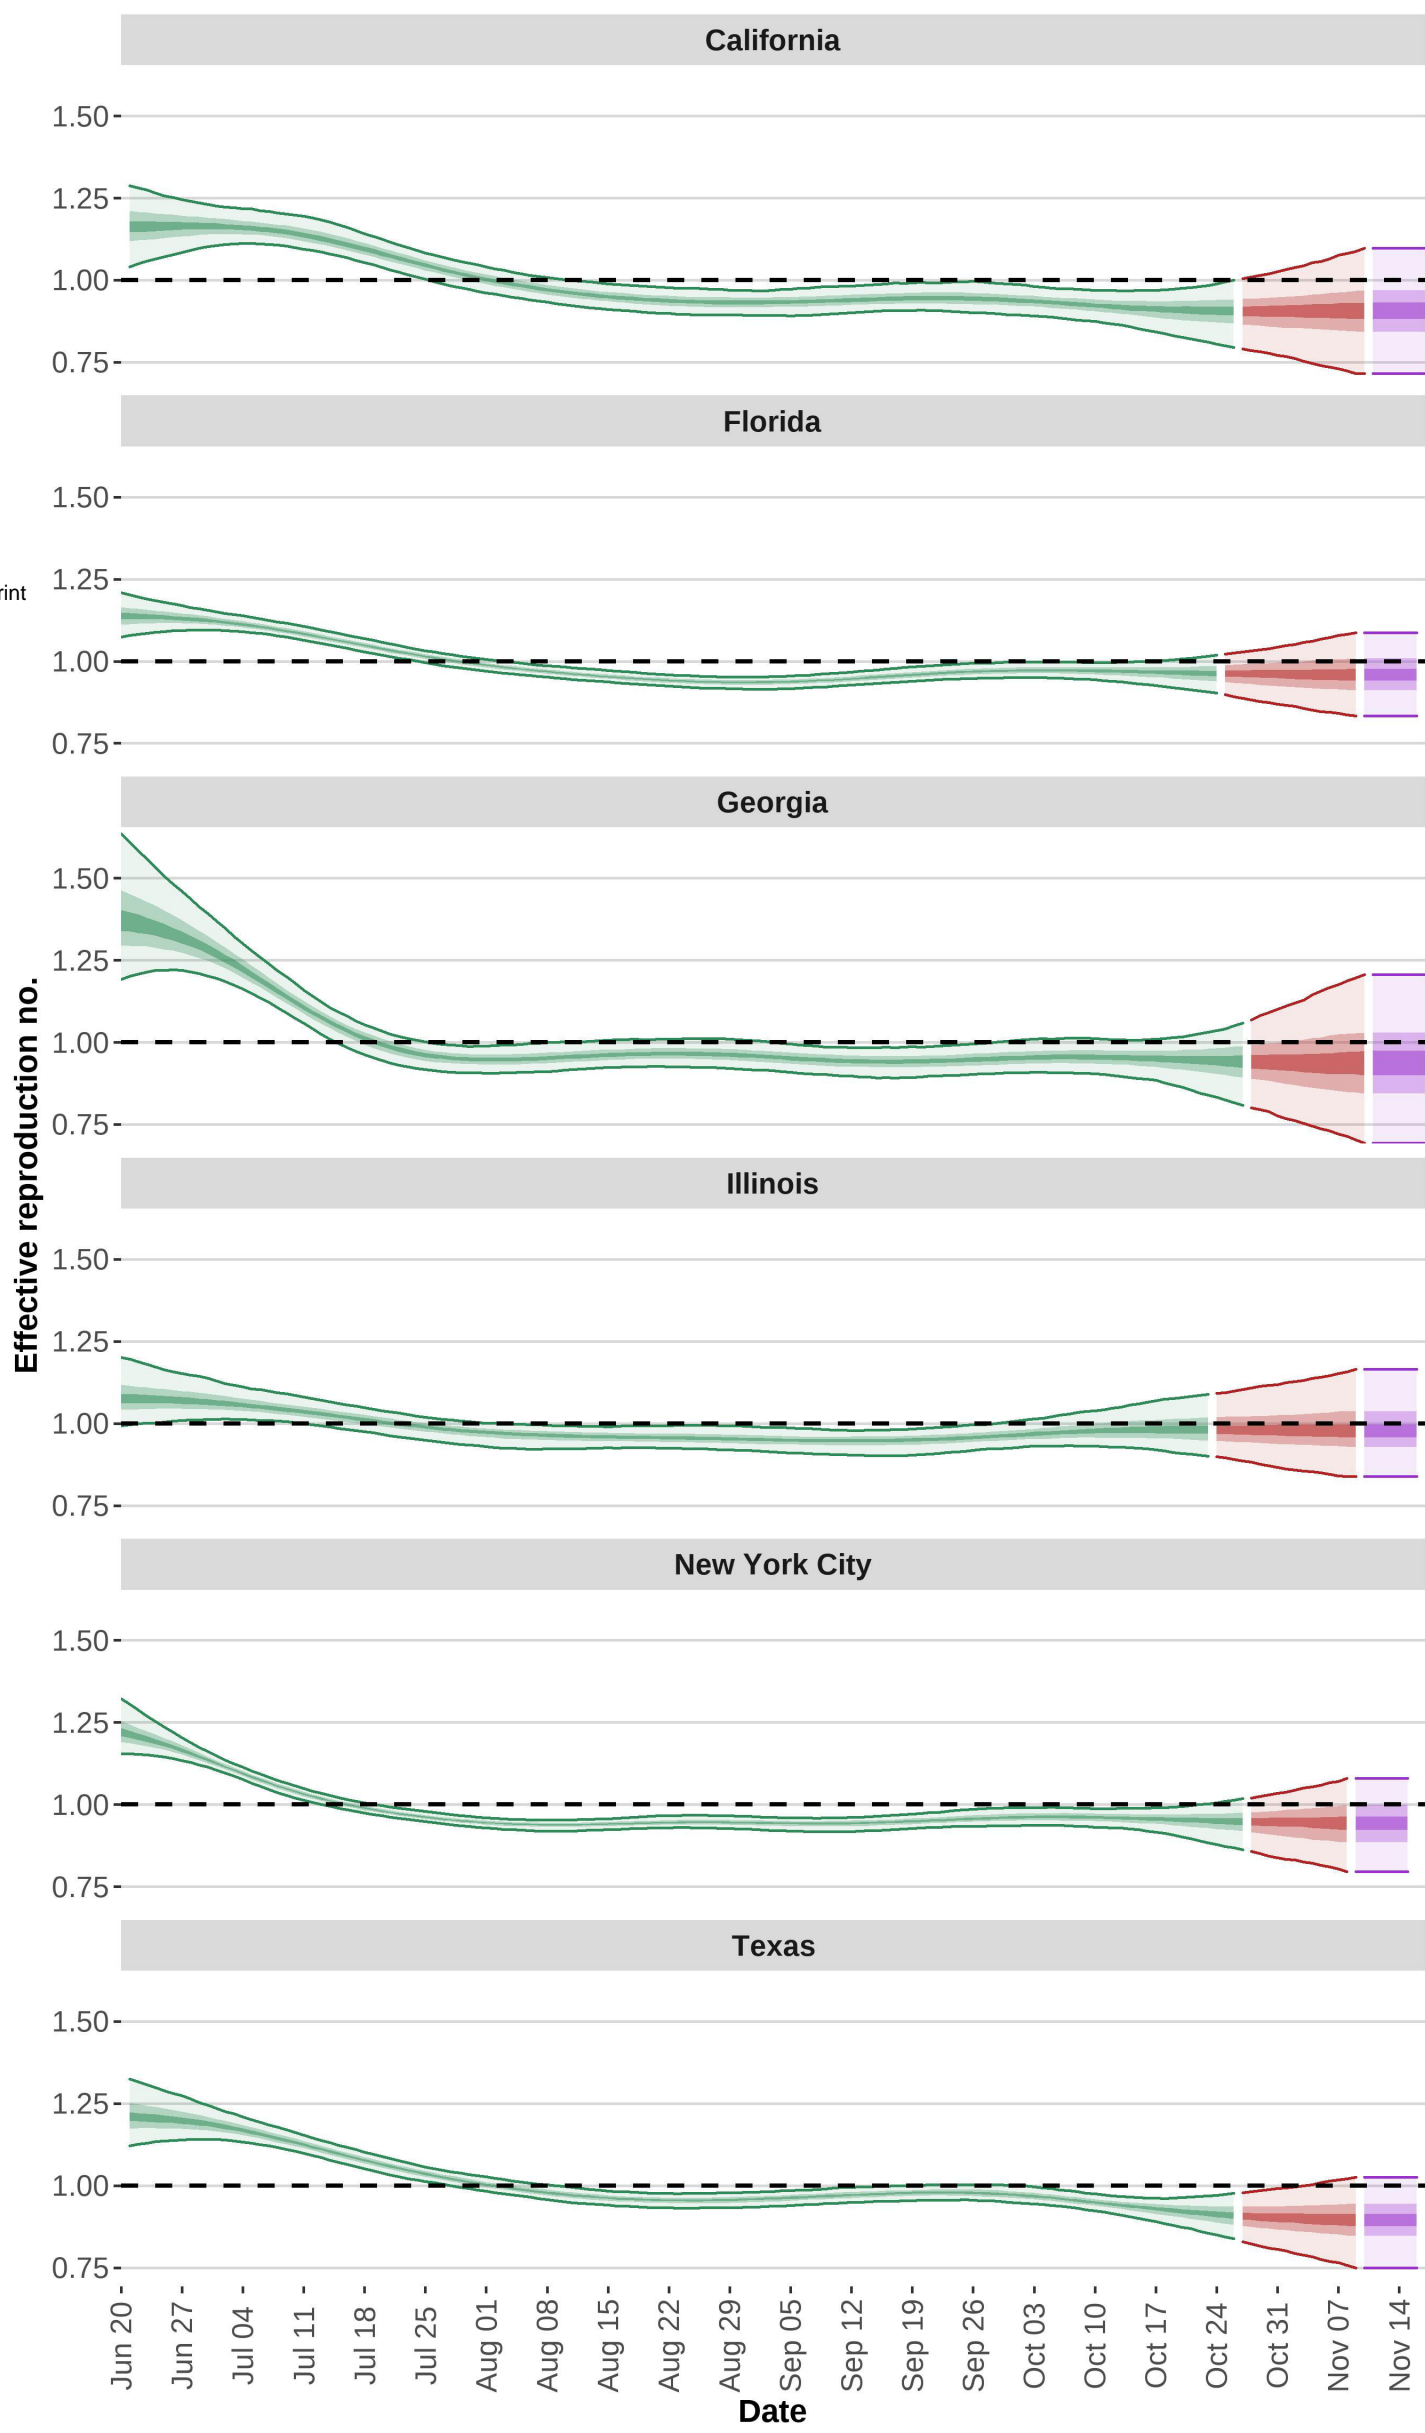

medRxiv preprint doi: <https://doi.org/10.1101/2023.04.14.23288570>; this version posted May 8, 2023. The copyright holder for this preprint (which was not certified by peer review) is the author/funder, who has granted medRxiv a license to display the preprint in perpetuity. This article is a US Government work. It is not subject to copyright under 17 USC 105 and is also made available for use under a CC0 license.

█ Estimate 
 █ Estimate based on partial data 
 █ Forecast
